# Supplementary material for: Transcriptome Profile Analysis of Mammary Gland Tissue from Two Breeds of Lactating Sheep
Source: PubMed Central journal article supplement (PMC6826511; doi:10.3390/genes10100781), 2019-10-08
Supplement: genes-10-00781-s001.pdf [file genes-10-00781-s001.pdf]

**Table S1.** The up-regulated genes in the mammary gland of the STH sheep compared with the GAM sheep.

| Gene ID             | Gene name | Base mean   | Base mean-GAM | Base mean-STH | Fold change | log <sub>2</sub> (Fold change) | P value   | Description                                                                                 |
|---------------------|-----------|-------------|---------------|---------------|-------------|--------------------------------|-----------|---------------------------------------------------------------------------------------------|
| ENSOARG00000005699  | UFC1      | 21.80852558 | 0.521053764   | 43.0959974    | 82.70931    | 6.369977831                    | 2.06E-07  | Uncharacterized protein [Source:UniProtKB/TrEMBL;Acc:W5P6Q6]                                |
| ENSOARG000000013119 | SNTG1     | 8.758370481 | 0.260526882   | 17.25621408   | 66.23583    | 6.049539927                    | 0.0027479 | Syntrophin, gamma 1 [Source:HGNC Symbol;Acc:HGNC:13740]                                     |
| ENSOARG000000010160 | GIPR      | 8.105104327 | 0.807424204   | 15.40278445   | 19.07645    | 4.253720534                    | 0.0071514 | Gastric inhibitory polypeptide receptor [Source:HGNC Symbol;Acc:HGNC:4271]                  |
| ENSOARG00000000714  | SNCG      | 5.714185855 | 0.591922793   | 10.83644892   | 18.3072     | 4.194339244                    | 0.0387692 | Synuclein, gamma (breast cancer-specific protein 1) [Source:HGNC Symbol;Acc:HGNC:11141]     |
| ENSOARG000000019344 | NEU2      | 10.85689932 | 1.138820115   | 20.57497852   | 18.06693    | 4.175279139                    | 0.0020472 | Sialidase 2 (cytosolic sialidase) [Source:HGNC Symbol;Acc:HGNC:7759]                        |
| ENSOARG00000000724  | -         | 11.29625806 | 1.73219007    | 20.86032605   | 12.04275    | 3.59009256                     | 0.0464916 | -                                                                                           |
| ENSOARG000000006532 | KCNK4     | 7.882984721 | 1.587557688   | 14.17841175   | 8.930958    | 3.158815011                    | 0.0411659 | Potassium channel, subfamily K, member 4 [Source:HGNC Symbol;Acc:HGNC:6279]                 |
| ENSOARG000000012671 | RNASE1    | 31.42267299 | 6.4483905     | 56.39695548   | 8.745896    | 3.128606265                    | 0.0271619 | Ribonuclease pancreatic [Source:UniProtKB/Swiss-Prot;Acc:P67927]                            |
| ENSOARG000000020334 | SPX       | 10.89263026 | 2.394981892   | 19.39027863   | 8.096211    | 3.017246881                    | 0.0172611 | Spexin hormone [Source:HGNC Symbol;Acc:HGNC:28139]                                          |
| ENSOARG000000005894 | CDH20     | 163.7153348 | 43.17893704   | 284.2517326   | 6.583111    | 2.718769509                    | 3.22E-10  | Cadherin 20, type 2 [Source:HGNC Symbol;Acc:HGNC:1760]                                      |
| ENSOARG000000007440 | GRIN3A    | 12.80810009 | 3.646802182   | 21.96939799   | 6.024291    | 2.590791489                    | 0.0207721 | Glutamate receptor, ionotropic, N-methyl-D-aspartate 3A [Source:HGNC Symbol;Acc:HGNC:16767] |
| ENSOARG000000002539 | MYRIP     | 32.10231044 | 9.740847538   | 54.46377334   | 5.591277    | 2.483177728                    | 0.0007048 | Myosin VIIA and Rab interacting protein [Source:HGNC Symbol;Acc:HGNC:19156]                 |
| ENSOARG000000015190 | -         | 243.9883915 | 74.82303815   | 413.1537449   | 5.521745    | 2.465124293                    | 0.0014163 | Uncharacterized protein [Source:UniProtKB/TrEMBL;Acc:W5Q0R2]                                |
| ENSOARG000000019726 | RNASE12   | 26.1924995  | 8.634532625   | 43.75046637   | 5.066918    | 2.341108402                    | 0.0340688 | Ribonuclease, RNase A family, 12 (non-active) [Source:HGNC Symbol;Acc:HGNC:24211]           |
| ENSOARG000000011248 | AMPD3     | 132.7364406 | 44.87262333   | 220.6002579   | 4.916144    | 2.297527043                    | 0.0013823 | Adenosine monophosphate deaminase 3 [Source:HGNC Symbol;Acc:HGNC:470]                       |
| ENSOARG000000017812 | CASKIN1   | 20.59876909 | 7.161996442   | 34.03554173   | 4.752242    | 2.248608366                    | 0.0101967 | CASK interacting protein 1 [Source:HGNC Symbol;Acc:HGNC:20879]                              |
| ENSOARG000000006766 | ASB5      | 17.33531992 | 6.563412005   | 28.10722784   | 4.282411    | 2.098423267                    | 0.0448267 | Ankyrin repeat and SOCS box containing 5 [Source:HGNC Symbol;Acc:HGNC:17180]                |
| ENSOARG000000003279 | KCNIP1    | 18.64209439 | 7.252920379   | 30.03126839   | 4.140576    | 2.049831493                    | 0.0225371 | Kv channel interacting protein 1 [Source:HGNC Symbol;Acc:HGNC:15521]                        |
| ENSOARG000000013948 | GABRA1    | 20.44878247 | 8.225606041   | 32.67195891   | 3.971982    | 1.989859075                    | 0.0206184 | Gamma-aminobutyric acid (GABA) A receptor, alpha 1 [Source:HGNC Symbol;Acc:HGNC:4075]       |
| ENSOARG000000013223 | RHBDL1    | 26.44419551 | 10.93953355   | 41.94885747   | 3.834611    | 1.939080293                    | 0.0293236 | Rhomboid, veinlet-like 1 (Drosophila) [Source:HGNC Symbol;Acc:HGNC:10007]                   |
| ENSOARG000000002469 | -         | 307.3492226 | 127.9895681   | 486.708877    | 3.802723    | 1.927032861                    | 0.0113325 | -                                                                                           |
| ENSOARG000000009458 | -         | 34.3393511  | 15.1839772    | 53.494725     | 3.523104    | 1.816846907                    | 0.003524  | Uncharacterized protein [Source:UniProtKB/TrEMBL;Acc:W5PI81]                                |
| ENSOARG000000013636 | CDKN1A    | 117.1247866 | 54.59408359   | 179.6554896   | 3.29075     | 1.718416501                    | 0.0426504 | <i>Ovis aries</i> cyclin-dependent kinase inhibitor 1A (p21, Cip1) (CDKN1A), mRNA           |

| [Source:RefSeqmRNA;Acc:NM_001161880] |          |             |             |             |          |             |           |                                                                        |                                       |
|--------------------------------------|----------|-------------|-------------|-------------|----------|-------------|-----------|------------------------------------------------------------------------|---------------------------------------|
| ENSOARG00000018585                   | NOX5     | 114.1739114 | 56.44876439 | 171.8990584 | 3.045223 | 1.606547735 | 0.0011552 | NADPH oxidase, EF-hand calcium binding domain 5                        | [Source:HGNC Symbol;Acc:HGNC:14874]   |
| ENSOARG00000009381                   | PLA2G2C  | 207.5902297 | 103.5560238 | 311.6244356 | 3.009235 | 1.589396888 | 0.0002552 | Phospholipase A2, group IIC                                            | [Source:HGNC Symbol;Acc:HGNC:9032]    |
| ENSOARG00000017483                   | HOXD4    | 27.44644248 | 13.75357216 | 41.13931279 | 2.991173 | 1.580711322 | 0.0276371 | Homeobox D4                                                            | [Source:HGNC Symbol;Acc:HGNC:5138]    |
| ENSOARG00000007618                   | IL3RA    | 59.76831789 | 30.00970654 | 89.52692924 | 2.983266 | 1.576892492 | 0.0307495 | Interleukin 3 receptor, alpha (low affinity)                           | [Source:HGNC Symbol;Acc:HGNC:6012]    |
| ENSOARG00000016907                   | UNC5C    | 210.7270196 | 105.9135149 | 315.5405244 | 2.979228 | 1.574938607 | 0.0195074 | Unc-5 homolog C (C. elegans)                                           | [Source:HGNC Symbol;Acc:HGNC:12569]   |
| ENSOARG00000007828                   | SNTA1    | 97.91585228 | 49.41387095 | 146.4178336 | 2.963092 | 1.567103302 | 0.041657  | Syntrophin, alpha 1                                                    | [Source:HGNC Symbol;Acc:HGNC:11167]   |
| ENSOARG00000009197                   | ACADSB   | 501.5286338 | 256.2069868 | 746.8502808 | 2.915027 | 1.54350924  | 9.71E-07  | Acyl-CoA dehydrogenase, short/branched chain                           | [Source:HGNC Symbol;Acc:HGNC:91]      |
| ENSOARG00000010394                   | LEPR     | 199.5704477 | 102.7141385 | 296.4267568 | 2.885939 | 1.529040897 | 0.0437272 | <i>Ovis aries</i> leptin receptor (LEPR), mRNA                         | [Source:RefSeq mRNA;Acc:NM_001009763] |
| ENSOARG00000007561                   | SNAP91   | 35.65156655 | 18.44530622 | 52.85782687 | 2.865652 | 1.518863373 | 0.0395895 | Synaptosomal-associated protein, 91kDa                                 | [Source:HGNC Symbol;Acc:HGNC:14986]   |
| ENSOARG00000012284                   | NIPAL4   | 43.77214505 | 22.71081772 | 64.83347238 | 2.85474  | 1.513359191 | 0.0089381 | NIPA-like domain containing 4                                          | [Source:HGNC Symbol;Acc:HGNC:28018]   |
| ENSOARG00000000465                   | RELN     | 1302.762493 | 676.4612894 | 1929.063698 | 2.851699 | 1.511821499 | 0.0272581 | Reelin                                                                 | [Source:HGNC Symbol;Acc:HGNC:9957]    |
| ENSOARG00000014408                   | ADGRG2   | 234.3768852 | 122.0110494 | 346.7427209 | 2.841896 | 1.506853791 | 1.72E-05  | G protein-coupled receptor 64                                          | [Source:HGNC Symbol;Acc:HGNC:4516]    |
| ENSOARG00000003813                   | C16orf71 | 31.80995958 | 16.56565942 | 47.05425974 | 2.84047  | 1.5061297   | 0.0353878 | Chromosome 16 open reading frame 71                                    | [Source:HGNC Symbol;Acc:HGNC:25081]   |
| ENSOARG00000014150                   | -        | 34.95545746 | 18.24471521 | 51.6661997  | 2.831845 | 1.501742139 | 0.029363  | Ribosomal protein                                                      | [Source:UniProtKB/TrEMBL;Acc:W5PXK5]  |
| ENSOARG00000011385                   | TMEM42   | 32.3427742  | 17.27983953 | 47.40570886 | 2.743411 | 1.455970987 | 0.0441557 | Transmembrane protein 42                                               | [Source:HGNC Symbol;Acc:HGNC:28444]   |
| ENSOARG00000005911                   | INSC     | 85.5921101  | 46.01962223 | 125.164598  | 2.719809 | 1.443505517 | 0.0045958 | Inscuteable homolog (Drosophila)                                       | [Source:HGNC Symbol;Acc:HGNC:33116]   |
| ENSOARG00000014253                   | SLC7A11  | 188.0951449 | 102.9295745 | 273.2607153 | 2.654832 | 1.408620501 | 0.0192654 | Anionic amino acid transporter light chain xCT;Uncharacterized protein | [Source:UniProtKB/TrEMBL;Acc:H2EUS8]  |
| ENSOARG00000020860                   | ALDH1A2  | 44.93049346 | 24.81970452 | 65.0412824  | 2.62055  | 1.389869763 | 0.0322404 | Aldehyde dehydrogenase 1 family, member A2                             | [Source:HGNC Symbol;Acc:HGNC:15472]   |
| ENSOARG00000003423                   | CYP1A1   | 28.09554305 | 15.80608504 | 40.38500106 | 2.555029 | 1.353339503 | 0.0378788 | <i>Ovis aries</i> cytochrome P4501A1 (CYP1A1), mRNA                    | [Source:RefSeq mRNA;Acc:NM_001129905] |
| ENSOARG00000004231                   | LRR3B    | 40.04687079 | 22.53368014 | 57.56006144 | 2.554401 | 1.352985182 | 0.0298575 | Leucine rich repeat containing 3B                                      | [Source:HGNC Symbol;Acc:HGNC:28105]   |
| ENSOARG00000004563                   | NKIRAS1  | 56.19052069 | 32.95845277 | 79.42258861 | 2.409779 | 1.268900866 | 0.0160861 | NFKB inhibitor interacting Ras-like 1                                  | [Source:HGNC Symbol;Acc:HGNC:17899]   |
| ENSOARG00000020932                   | C2orf40  | 69.93876543 | 41.27700407 | 98.60052678 | 2.388752 | 1.256257092 | 0.027124  | Chromosome 2 open reading frame 40                                     | [Source:HGNC Symbol;Acc:HGNC:24642]   |
| ENSOARG00000009400                   | PLIN4    | 81.6804045  | 48.25896861 | 115.1018404 | 2.385087 | 1.254041914 | 0.0097078 | Perilipin 4                                                            | [Source:HGNC Symbol;Acc:HGNC:29393]   |
| ENSOARG00000005390                   | TMEM184A | 359.6646113 | 213.9511258 | 505.3780968 | 2.362119 | 1.240081869 | 0.0006277 | Transmembrane protein 184A                                             | [Source:HGNC Symbol;Acc:HGNC:28797]   |
| ENSOARG00000002849                   | -        | 50.45038997 | 30.22396616 | 70.67681378 | 2.338436 | 1.225544011 | 0.0313438 | -                                                                      |                                       |

|                    |          |             |             |             |          |             |           |                                                                                                                                                                                                         |
|--------------------|----------|-------------|-------------|-------------|----------|-------------|-----------|---------------------------------------------------------------------------------------------------------------------------------------------------------------------------------------------------------|
| ENSOARG00000003957 | -        | 90.73659124 | 54.60370954 | 126.8694729 | 2.323459 | 1.216274103 | 0.007007  | 60S ribosomal protein L13 [Source:UniProtKB/TrEMBL;Acc:W5P1C7]                                                                                                                                          |
| ENSOARG00000004943 | FAM135B  | 958.7224716 | 584.4433729 | 1333.00157  | 2.280805 | 1.189543327 | 0.0036027 | Family with sequence similarity 135, member B [Source:HGNC Symbol;Acc:HGNC:28029]                                                                                                                       |
| ENSOARG00000006407 | EPHA5    | 1274.135407 | 777.3305922 | 1770.940222 | 2.278233 | 1.187915315 | 1.22E-05  | EPH receptor A5 [Source:HGNC Symbol;Acc:HGNC:3389]                                                                                                                                                      |
| ENSOARG00000010183 | CTTNBP2  | 812.066898  | 497.6082063 | 1126.52559  | 2.263881 | 1.178797903 | 0.0008262 | <i>Ovis aries</i> cortactin binding protein 2 (CTTNBP2), mRNA [Source:RefSeq mRNA;Acc:NM_001195311]                                                                                                     |
| ENSOARG00000013348 | DAGLA    | 250.2245913 | 155.0233226 | 345.4258601 | 2.228219 | 1.155890814 | 0.0006696 | Diacylglycerol lipase, alpha [Source:HGNC Symbol;Acc:HGNC:1165]                                                                                                                                         |
| ENSOARG00000009705 | WISP3    | 370.144582  | 230.1648537 | 510.1243103 | 2.216343 | 1.148181305 | 0.0065636 | WNT1 inducible signaling pathway protein 3 [Source:HGNC Symbol;Acc:HGNC:12771]                                                                                                                          |
| ENSOARG00000005014 | ABLIM3   | 619.5466386 | 385.6858839 | 853.4073932 | 2.212701 | 1.145808265 | 8.22E-05  | Actin binding LIM protein family, member 3 [Source:HGNC Symbol;Acc:HGNC:29132]                                                                                                                          |
| ENSOARG00000020309 | DLL4     | 422.9912531 | 268.2788893 | 577.7036169 | 2.15337  | 1.106595993 | 0.0009079 | Delta-like 4 ( <i>Drosophila</i> ) [Source:HGNC Symbol;Acc:HGNC:2910]                                                                                                                                   |
| ENSOARG00000006391 | SERPINB5 | 131.2364501 | 83.44656764 | 179.0263326 | 2.145401 | 1.101247191 | 0.0048986 | Serpin peptidase inhibitor, clade B (ovalbumin), member 5 [Source:HGNC Symbol;Acc:HGNC:8949]                                                                                                            |
| ENSOARG00000000474 | GJA4     | 100.5783395 | 64.17784845 | 136.9788306 | 2.134363 | 1.093805619 | 0.0110677 | Gap junction protein, alpha 4, 37kDa [Source:HGNC Symbol;Acc:HGNC:4278]                                                                                                                                 |
| ENSOARG00000018720 | SNPH     | 162.7524299 | 104.2866969 | 221.2181628 | 2.12125  | 1.084914706 | 0.0051949 | Syntaphilin [Source:HGNC Symbol;Acc:HGNC:15931]"                                                                                                                                                        |
| ENSOARG00000005655 | MMP28    | 186.5021481 | 119.7454672 | 253.2588291 | 2.114976 | 1.080641519 | 0.0051728 | Matrix metalloproteinase 28 [Source:HGNC Symbol;Acc:HGNC:14366]                                                                                                                                         |
| ENSOARG00000003976 | SH2D4A   | 279.9543332 | 180.2660656 | 379.6426009 | 2.106013 | 1.07451405  | 0.0065911 | SH2 domain containing 4A [Source:HGNC Symbol;Acc:HGNC:26102]                                                                                                                                            |
| ENSOARG00000006059 | BEND7    | 198.1845551 | 127.637656  | 268.7314542 | 2.105425 | 1.074111174 | 0.0072055 | BEN domain containing 7 [Source:HGNC Symbol;Acc:HGNC:23514]                                                                                                                                             |
| ENSOARG00000001496 | ZSWIM5   | 81.70204826 | 53.0454639  | 110.3586326 | 2.080454 | 1.056898195 | 0.0217781 | Zinc finger, SWIM-type containing 5 [Source:HGNC Symbol;Acc:HGNC:29299]                                                                                                                                 |
| ENSOARG00000008661 | CCDC37   | 70.53922177 | 45.8135414  | 95.26490213 | 2.079405 | 1.056170701 | 0.0394244 | Coiled-coil domain containing 37 [Source:HGNC Symbol;Acc:HGNC:26842]                                                                                                                                    |
| ENSOARG00000008806 | WIPF3    | 216.7401769 | 140.9682642 | 292.5120896 | 2.075021 | 1.053125844 | 0.0017936 | WAS/WASL interacting protein family, member 3 [Source:HGNC Symbol;Acc:HGNC:22004]                                                                                                                       |
| ENSOARG00000008361 | ARSD     | 123.3897061 | 80.46696874 | 166.3124435 | 2.066841 | 1.047427524 | 0.0471848 | Arylsulfatase D [Source:HGNC Symbol;Acc:HGNC:717]                                                                                                                                                       |
| ENSOARG00000006153 | PDGFA    | 85.00395759 | 55.5584316  | 114.4494836 | 2.059984 | 1.042633175 | 0.0342606 | Platelet-derived growth factor alpha polypeptide [Source:HGNC Symbol;Acc:HGNC:8799]                                                                                                                     |
| ENSOARG00000009523 | SLC25A15 | 561.6781781 | 367.3128888 | 756.0434674 | 2.058309 | 1.041459662 | 0.0006772 | <i>Ovis aries</i> solute carrier family 25 (mitochondrial carrier; ornithine transporter) member 15 (SLC25A15), nuclear gene encoding mitochondrial protein, mRNA [Source:RefSeq mRNA;Acc:NM_001127276] |
| ENSOARG00000001753 | NQO2     | 155.2188589 | 101.5840059 | 208.8537119 | 2.05597  | 1.039819512 | 0.0122971 | NAD(P)H dehydrogenase, quinone 2 [Source:HGNC Symbol;Acc:HGNC:7856]                                                                                                                                     |
| ENSOARG00000004847 | PDE10A   | 270.8689677 | 178.1933998 | 363.5445356 | 2.040168 | 1.02868821  | 0.0059556 | Phosphodiesterase 10A [Source:HGNC Symbol;Acc:HGNC:8772]                                                                                                                                                |
| ENSOARG00000001390 | SRD5A3   | 111.5636771 | 73.64114391 | 149.4862104 | 2.029928 | 1.021428464 | 0.0110381 | Steroid 5 alpha-reductase 3 [Source:HGNC Symbol;Acc:HGNC:25812]                                                                                                                                         |
| ENSOARG00000015706 | MYLK3    | 89.00664293 | 59.15717403 | 118.8561118 | 2.009158 | 1.006591051 | 0.0214293 | Myosin light chain kinase 3 [Source:HGNC Symbol;Acc:HGNC:29826]                                                                                                                                         |

---

|                    |      |             |             |             |          |             |           |                                                       |                                    |
|--------------------|------|-------------|-------------|-------------|----------|-------------|-----------|-------------------------------------------------------|------------------------------------|
| ENSOARG00000017441 | NOD2 | 1147.689563 | 763.837986  | 1531.541141 | 2.00506  | 1.003645549 | 0.013456  | Nucleotide-binding oligomerization domaincontaining 2 | [Source:HGNC Symbol;Acc:HGNC:5331] |
| ENSOARG00000011450 | FEZ1 | 72.1825533  | 48.09660147 | 96.26850512 | 2.001566 | 1.001128932 | 0.0436743 | Fasciculation and elongation protein zeta 1 (zyginI)  | [Source:HGNC Symbol;Acc:HGNC:3659] |

---

**Table S2.** The down-regulated genes in the mammary gland of the STH sheep compared with the GAM sheep.

| Gene ID             | Gene name | Base mean | Base mean-GAM | Base mean-STH | Fold change | log <sub>2</sub> (Fold change) | P value  | Description                                                                                              |
|---------------------|-----------|-----------|---------------|---------------|-------------|--------------------------------|----------|----------------------------------------------------------------------------------------------------------|
| ENSOARG00000000415  | RNF122    | 38.04557  | 75.77284      | 0.318297      | 0.004201    | -7.89516                       | 0.009321 | Uncharacterized protein [Source:UniProtKB/TrEMBL;Acc:W5NQG5]                                             |
| ENSOARG00000001169  | -         | 121.4945  | 239.2925      | 3.696418      | 0.015447    | -6.0165                        | 0.007016 | Uncharacterized protein [Source:UniProtKB/TrEMBL;Acc:W5NSR6]                                             |
| ENSOARG000000014784 | SHISA6    | 103.8983  | 202.4546      | 5.342038      | 0.026386    | -5.24406                       | 1.05E-05 | Shisa family member 6 [Source:HGNC Symbol;Acc:HGNC:34491]                                                |
| ENSOARG00000001219  | TXLNB     | 6.231411  | 12.08125      | 0.381574      | 0.031584    | -4.98466                       | 0.013157 | Taxilin beta [Source:HGNC Symbol;Acc:HGNC:21617]                                                         |
| ENSOARG00000007987  | GZMK      | 15.68494  | 30.40414      | 0.965738      | 0.031763    | -4.97649                       | 0.005976 | Granzyme K (granzyme 3; tryptase II) [Source:HGNC Symbol;Acc:HGNC:4711]                                  |
| ENSOARG00000004467  | SCN7A     | 66.86946  | 129.5794      | 4.159552      | 0.0321      | -4.96126                       | 0.004872 | Sodium channel, voltage-gated, type VII, alphasubunit [Source:HGNC Symbol;Acc:HGNC:10594]                |
| ENSOARG00000020250  | C12orf60  | 4.63943   | 8.956947      | 0.321913      | 0.03594     | -4.79827                       | 0.044571 | Chromosome 12 open reading frame 60 [Source:HGNC Symbol;Acc:HGNC:28726]                                  |
| ENSOARG00000001488  | HIST3H3   | 5.134687  | 9.8878        | 0.381574      | 0.03859     | -4.69561                       | 0.041961 | Histone cluster 3, H3 [Source:HGNC Symbol;Acc:HGNC:4778]                                                 |
| ENSOARG000000013873 | RGS20     | 7.992227  | 15.34786      | 0.636593      | 0.041478    | -4.59152                       | 0.006997 | Regulator of G-protein signaling 20 [Source:HGNC Symbol;Acc:HGNC:14600]                                  |
| ENSOARG000000014427 | -         | 10.4941   | 20.0333       | 0.95489       | 0.047665    | -4.39092                       | 0.041148 | Uncharacterized protein [Source:UniProtKB/TrEMBL;Acc:W5PYE6]                                             |
| ENSOARG000000018798 | DNAJC22   | 11.20955  | 21.33766      | 1.081445      | 0.050682    | -4.30237                       | 0.048476 | DnaJ (Hsp40) homolog, subfamily C, member 22 [Source:HGNC Symbol;Acc:HGNC:25802]                         |
| ENSOARG000000018245 | GCNT7     | 18.33724  | 34.88593      | 1.788547      | 0.051268    | -4.28579                       | 0.047535 | Glucosaminyl (N-acetyl) transferase family member 7 [Source:HGNC Symbol;Acc:HGNC:16099]                  |
| ENSOARG00000008552  | ARHGEF33  | 625.8271  | 1187.287      | 64.36672      | 0.054213    | -4.20521                       | 0.001114 | Rho guanine nucleotide exchange factor (GEF) 33 [Source:HGNC Symbol;Acc:HGNC:37252]                      |
| ENSOARG000000012471 | GDF5      | 5.448809  | 10.25379      | 0.643825      | 0.062789    | -3.99335                       | 0.044722 | Growth differentiation factor 5 [Source:HGNC Symbol;Acc:HGNC:4220]                                       |
| ENSOARG000000020452 | NYAP2     | 8.040989  | 15.06381      | 1.018167      | 0.06759     | -3.88704                       | 0.014675 | Neuronal tyrosine-phosphorylated phosphoinositide-3-kinase adaptor 2 [Source:HGNC Symbol;Acc:HGNC:29291] |
| ENSOARG000000015341 | TSPAN19   | 6.736823  | 12.50791      | 0.965738      | 0.07721     | -3.69507                       | 0.036955 | Tetraspanin 19 [Source:HGNC Symbol;Acc:HGNC:31886]                                                       |
| ENSOARG000000001543 | -         | 6.58028   | 12.19482      | 0.965738      | 0.079192    | -3.65849                       | 0.046455 | Uncharacterized protein [Source:UniProtKB/TrEMBL;Acc:W5NTW6]                                             |
| ENSOARG000000017103 | MATN3     | 11.30406  | 20.93889      | 1.669224      | 0.079719    | -3.64894                       | 0.030064 | Matrilin 3 [Source:HGNC Symbol;Acc:HGNC:6909]                                                            |
| ENSOARG000000005049 | CP        | 13.54586  | 24.80227      | 2.289445      | 0.092308    | -3.4374                        | 0.002972 | <i>Ovis aries</i> ceruloplasmin (ferroxidase) (CP), mRNA [Source:RefSeq mRNA;Acc:NM_001009733]           |
| ENSOARG000000011773 | -         | 21.02865  | 38.4802       | 3.577095      | 0.092959    | -3.42726                       | 0.012686 | Uncharacterized protein [Source:UniProtKB/TrEMBL;Acc:W5PQ95]                                             |
| ENSOARG000000001542 | GIMAP2    | 9.438273  | 17.21455      | 1.661993      | 0.096546    | -3.37264                       | 0.039586 | GTPase, IMAP family member 2 [Source:HGNC Symbol;Acc:HGNC:21789]                                         |
| ENSOARG000000005582 | C5        | 4570.469  | 8303.358      | 837.5795      | 0.100872    | -3.3094                        | 9.05E-05 | Complement component 5 [Source:HGNC Symbol;Acc:HGNC:1331]                                                |
| ENSOARG000000004653 | CNDP1     | 7.131544  | 12.80007      | 1.463019      | 0.114298    | -3.12913                       | 0.049564 | Carnosine dipeptidase 1 (metallopeptidase M20family) [Source:HGNC Symbol;Acc:HGNC:20675]                 |
| ENSOARG000000002875 | -         | 177.0609  | 316.7276      | 37.39426      | 0.118064    | -3.08235                       | 3.14E-05 | -                                                                                                        |

|                    |         |          |          |          |          |          |          |                                                                                                                      |
|--------------------|---------|----------|----------|----------|----------|----------|----------|----------------------------------------------------------------------------------------------------------------------|
| ENSOARG00000013047 | RAB19   | 9.906422 | 17.71323 | 2.099612 | 0.118534 | -3.07663 | 0.039311 | RAB19, member RAS oncogene family [Source:HGNC Symbol;Acc:HGNC:19982]                                                |
| ENSOARG00000006960 | FCRL1   | 14.16128 | 25.31326 | 3.009304 | 0.118883 | -3.07239 | 0.033629 | Fc receptor-like 1 [Source:HGNC Symbol;Acc:HGNC:18509]                                                               |
| ENSOARG00000004675 | SCN9A   | 113.6526 | 202.4891 | 24.81609 | 0.122555 | -3.0285  | 1.23E-10 | Sodium channel, voltage-gated, type IX, alpha subunit [Source:HGNC Symbol;Acc:HGNC:10597]                            |
| ENSOARG00000001271 | ENTPD8  | 27.42813 | 48.78885 | 6.067423 | 0.124361 | -3.0074  | 0.018941 | Ectonucleoside triphosphate diphosphohydrolase 8 [Source:HGNC Symbol;Acc:HGNC:24860]                                 |
| ENSOARG00000015870 | PAH     | 10.05082 | 17.8122  | 2.289445 | 0.128532 | -2.9598  | 0.026041 | Phenylalanine hydroxylase [Source:HGNC Symbol;Acc:HGNC:8582]                                                         |
| ENSOARG00000002032 | -       | 27.81327 | 48.86638 | 6.760163 | 0.13834  | -2.85371 | 0.010063 | -                                                                                                                    |
| ENSOARG00000003072 | -       | 16.54116 | 28.90831 | 4.174015 | 0.144388 | -2.79198 | 0.00786  | Uncharacterized protein [Source:UniProtKB/TrEMBL;Acc:W5NYM2]                                                         |
| ENSOARG00000004062 | RAB38   | 22.67112 | 39.53707 | 5.805172 | 0.146829 | -2.7678  | 0.00131  | RAB38, member RAS oncogene family [Source:HGNC Symbol;Acc:HGNC:9776]                                                 |
| ENSOARG00000001114 | -       | 259.4486 | 452.1217 | 66.77547 | 0.147694 | -2.75932 | 7.14E-07 | Uncharacterized protein [Source:UniProtKB/TrEMBL;Acc:W5NSL4]                                                         |
| ENSOARG00000004007 | LIPG    | 1115.759 | 1940.39  | 291.1283 | 0.150036 | -2.73662 | 0.032912 | Lipase, endothelial [Source:HGNC Symbol;Acc:HGNC:6623]                                                               |
| ENSOARG00000004789 | HTR4    | 11.98899 | 20.79331 | 3.184673 | 0.153159 | -2.7069  | 0.026877 | 5-hydroxytryptamine (serotonin) receptor 4, Gprotein-coupled [Source:HGNC Symbol;Acc:HGNC:5299]                      |
| ENSOARG00000001282 | -       | 244.9585 | 424.3495 | 65.56747 | 0.154513 | -2.6942  | 2.32E-07 | Uncharacterized protein [Source:UniProtKB/TrEMBL;Acc:W5NT39]                                                         |
| ENSOARG00000002425 | -       | 122.1622 | 211.5089 | 32.81537 | 0.155149 | -2.68827 | 1.88E-08 | -                                                                                                                    |
| ENSOARG00000014467 | EOMES   | 30.78865 | 52.67063 | 8.90668  | 0.169101 | -2.56404 | 0.014572 | Eomesodermin [Source:HGNC Symbol;Acc:HGNC:3372]                                                                      |
| ENSOARG00000015375 | ERC2    | 18.72002 | 31.96231 | 5.477734 | 0.171381 | -2.54472 | 0.00502  | ELKS/RAB6-interacting/CAST family member 2 [Source:HGNC Symbol;Acc:HGNC:31922]                                       |
| ENSOARG00000014165 | RIPPLY3 | 11.22614 | 19.14276 | 3.309522 | 0.172886 | -2.5321  | 0.031304 | Ripply transcriptional repressor 3 [Source:HGNC Symbol;Acc:HGNC:3047]                                                |
| ENSOARG00000016321 | KAZALD1 | 12.46325 | 21.03473 | 3.891776 | 0.185017 | -2.43427 | 0.029431 | Kazal-type serine peptidase inhibitor domain 1 [Source:HGNC Symbol;Acc:HGNC:25460]                                   |
| ENSOARG00000019354 | SLC7A8  | 20.65012 | 34.74277 | 6.557472 | 0.188744 | -2.4055  | 0.045049 | Solute carrier family 7 (amino acid transporter/light chain, L system), member 8 [Source:HGNC Symbol;Acc:HGNC:11066] |
| ENSOARG00000015313 | SPOCK1  | 17.7569  | 29.705   | 5.808787 | 0.195549 | -2.3544  | 0.02379  | Sparc/osteonectin, cwcv and kazal-like domains proteoglycan (testican) 1 [Source:HGNC Symbol;Acc:HGNC:11251]         |
| ENSOARG00000008310 | TTC29   | 11.79714 | 19.57956 | 4.014715 | 0.205046 | -2.28598 | 0.045261 | Tetratricopeptide repeat domain 29 [Source:HGNC Symbol;Acc:HGNC:29936]                                               |
| ENSOARG00000017006 | -       | 123.4262 | 204.4746 | 42.37784 | 0.207252 | -2.27054 | 0.034817 | Uncharacterized protein [Source:UniProtKB/TrEMBL;Acc:W5Q6B6]                                                         |
| ENSOARG00000001710 | CD19    | 36.22469 | 59.93657 | 12.5128  | 0.208767 | -2.26003 | 0.000669 | CD19 molecule [Source:HGNC Symbol;Acc:HGNC:1633]                                                                     |
| ENSOARG00000011787 | -       | 23.00508 | 38.01487 | 7.995282 | 0.21032  | -2.24934 | 0.018451 | Uncharacterized protein [Source:UniProtKB/TrEMBL;Acc:W5PQA4]                                                         |
| ENSOARG00000006104 | MB21D1  | 19.51994 | 32.14242 | 6.897464 | 0.214591 | -2.22034 | 0.011377 | Mab-21 domain containing 1 [Source:HGNC Symbol;Acc:HGNC:21367]                                                       |
| ENSOARG00000017651 | -       | 15.77523 | 25.79218 | 5.758267 | 0.223256 | -2.16323 | 0.032077 | -                                                                                                                    |
| ENSOARG00000014329 | ACOXL   | 15.01037 | 24.39284 | 5.627893 | 0.230719 | -2.11579 | 0.041309 | Acyl-CoA oxidase-like [Source:HGNC Symbol;Acc:HGNC:25621]                                                            |
| ENSOARG00000017181 | CCDC158 | 27.82525 | 45.04556 | 10.60493 | 0.235427 | -2.08665 | 0.005854 | Coiled-coil domain containing 158 [Source:HGNC Symbol;Acc:HGNC:26374]                                                |

|                     |         |          |          |          |          |          |          |                                                                                                              |
|---------------------|---------|----------|----------|----------|----------|----------|----------|--------------------------------------------------------------------------------------------------------------|
| ENSOARG00000016789  | NIPAL1  | 56.74119 | 91.44799 | 22.03438 | 0.24095  | -2.0532  | 0.000358 | NIPA-like domain containing 1 [Source:HGNC Symbol;Acc:HGNC:27194]                                            |
| ENSOARG00000013767  | IGSF9B  | 26.10002 | 42.00219 | 10.19784 | 0.242793 | -2.0422  | 0.041731 | Immunoglobulin superfamily, member 9B [Source:HGNC Symbol;Acc:HGNC:32326]                                    |
| ENSOARG00000021015  | CLEC7A  | 62.57862 | 100.6776 | 24.47961 | 0.243149 | -2.04009 | 0.033461 | Uncharacterized protein [Source:UniProtKB/TrEMBL;Acc:W5QIN1]                                                 |
| ENSOARG00000015616  | ABCA13  | 23.92234 | 38.46072 | 9.383973 | 0.243989 | -2.03511 | 0.045037 | ATP-binding cassette, sub-family A (ABC1), member13 [Source:HGNC Symbol;Acc:HGNC:14638]                      |
| ENSOARG00000005785  | MYO16   | 15.11541 | 24.2755  | 5.955331 | 0.245323 | -2.02725 | 0.043467 | Myosin XVI [Source:HGNC Symbol;Acc:HGNC:29822]                                                               |
| ENSOARG00000008972  | AGR2    | 180.7417 | 290.0853 | 71.39808 | 0.246128 | -2.02252 | 0.001904 | Anterior gradient 2 [Source:HGNC Symbol;Acc:HGNC:328]                                                        |
| ENSOARG00000000407  | -       | 18.25456 | 29.22456 | 7.284564 | 0.249262 | -2.00427 | 0.030626 | Ring finger protein 122 [Source:HGNC Symbol;Acc:HGNC:21147]                                                  |
| ENSOARG00000014842  | COL6A5  | 360.5958 | 575.3434 | 145.8483 | 0.253498 | -1.97995 | 0.000152 | Collagen, type VI, alpha 5 [Source:HGNC Symbol;Acc:HGNC:26674]                                               |
| ENSOARG00000015728  | -       | 82.42573 | 131.1324 | 33.71905 | 0.257137 | -1.95939 | 0.004437 | Uncharacterized protein [Source:UniProtKB/TrEMBL;Acc:W5Q2E4]                                                 |
| ENSOARG00000001026  | SLC13A5 | 18.44777 | 29.10817 | 7.78737  | 0.267532 | -1.90222 | 0.039356 | Solute carrier family 13 (sodium-dependent citratetransporter), member 5 [Source:HGNC Symbol;Acc:HGNC:23089] |
| ENSOARG000000008418 | SOSTDC1 | 25.33127 | 39.75228 | 10.91027 | 0.274456 | -1.86535 | 0.0099   | Sclerostin domain containing 1 [Source:HGNC Symbol;Acc:HGNC:21748]                                           |
| ENSOARG000000008702 | -       | 59.7357  | 93.66627 | 25.80513 | 0.275501 | -1.85987 | 0.007681 | Uncharacterized protein [Source:UniProtKB/TrEMBL;Acc:W5PFX6]                                                 |
| ENSOARG00000017898  | -       | 15.98647 | 25.0591  | 6.913837 | 0.275901 | -1.85778 | 0.04882  | Uncharacterized protein [Source:UniProtKB/TrEMBL;Acc:W5Q913]                                                 |
| ENSOARG00000009256  | CD3G    | 96.12402 | 150.5393 | 41.70871 | 0.277062 | -1.85172 | 0.030318 | CD3g molecule, gamma (CD3-TCR complex) [Source:HGNC Symbol;Acc:HGNC:1675]                                    |
| ENSOARG00000011756  | HSPH1   | 1870.521 | 2922.127 | 818.9147 | 0.280246 | -1.83523 | 0.027211 | Heat shock 105kDa/110kDa protein 1 [Source:HGNC Symbol;Acc:HGNC:16969]                                       |
| ENSOARG000000005501 | SCN3A   | 56.6262  | 88.39153 | 24.86088 | 0.281259 | -1.83003 | 0.013661 | Sodium channel, voltage-gated, type III, alphasubunit [Source:HGNC Symbol;Acc:HGNC:10590]                    |
| ENSOARG00000000355  | AGER    | 36.7374  | 57.33066 | 16.14414 | 0.281597 | -1.8283  | 0.006165 | Leucine rich repeat containing 31 [Source:HGNC Symbol;Acc:HGNC:26261]                                        |
| ENSOARG00000013999  | MSLN    | 19.12819 | 29.82901 | 8.427376 | 0.282523 | -1.82356 | 0.028363 | Mesothelin [Source:HGNC Symbol;Acc:HGNC:7371]                                                                |
| ENSOARG00000016200  | CACNA1D | 54.14378 | 84.3887  | 23.89886 | 0.2832   | -1.82011 | 0.026233 | Calcium channel, voltage-dependent, L type, alpha1D subunit [Source:HGNC Symbol;Acc:HGNC:1391]               |
| ENSOARG00000019146  | TGM1    | 21.34016 | 33.19118 | 9.489137 | 0.285893 | -1.80645 | 0.036665 | Transglutaminase 1 [Source:HGNC Symbol;Acc:HGNC:11777]                                                       |
| ENSOARG00000019502  | CELSR1  | 336.0651 | 522.3256 | 149.8046 | 0.286803 | -1.80187 | 6.98E-05 | Cadherin, EGF LAG seven-pass G-type receptor 1 [Source:HGNC Symbol;Acc:HGNC:1850]                            |
| ENSOARG00000005117  | THBD    | 650.6692 | 1007.258 | 294.0806 | 0.291962 | -1.77615 | 0.037344 | Thrombomodulin [Source:HGNC Symbol;Acc:HGNC:11784]                                                           |
| ENSOARG00000015517  | PLCL2   | 463.3924 | 714.2877 | 212.4971 | 0.297495 | -1.74906 | 0.026627 | Phospholipase C-like 2 [Source:HGNC Symbol;Acc:HGNC:9064]                                                    |
| ENSOARG00000003077  | AP3M2   | 22.39136 | 34.42006 | 10.36267 | 0.301065 | -1.73185 | 0.040011 | Adaptor-related protein complex 3, mu 2 subunit [Source:HGNC Symbol;Acc:HGNC:570]                            |
| ENSOARG00000004809  | -       | 32.62922 | 50.10154 | 15.15691 | 0.302524 | -1.72488 | 0.027949 | Uncharacterized protein [Source:UniProtKB/TrEMBL;Acc:W5P401]                                                 |
| ENSOARG00000014276  | SLC24A2 | 28.30474 | 43.08744 | 13.52203 | 0.313828 | -1.67196 | 0.049885 | Solute carrier family 24 (sodium/potassium/calciumexchanger), member 2 [Source:HGNC Symbol;Acc:HGNC:10976]   |
| ENSOARG00000021049  | -       | 23.39826 | 35.53159 | 11.26493 | 0.31704  | -1.65726 | 0.035339 | Uncharacterized protein [Source:UniProtKB/TrEMBL;Acc:W5QIS1]                                                 |
| ENSOARG00000013099  | FBXL7   | 71.50825 | 108.2    | 34.81646 | 0.321779 | -1.63586 | 0.00148  | F-box and leucine-rich repeat protein 7 [Source:HGNC Symbol;Acc:HGNC:13604]                                  |

|                    |          |          |          |          |          |          |          |                                                                                                                                        |
|--------------------|----------|----------|----------|----------|----------|----------|----------|----------------------------------------------------------------------------------------------------------------------------------------|
| ENSOARG00000010841 | DNAH11   | 88.091   | 133.2555 | 42.92646 | 0.322136 | -1.63426 | 0.004555 | Dynein, axonemal, heavy chain 11 [Source:HGNC Symbol;Acc:HGNC:2942]                                                                    |
| ENSOARG00000020882 | TEX9     | 57.87596 | 87.32628 | 28.42563 | 0.325511 | -1.61922 | 0.034449 | Testis expressed 9 [Source:HGNC Symbol;Acc:HGNC:29585]                                                                                 |
| ENSOARG00000017739 | CAPN6    | 179.9035 | 270.7374 | 89.06952 | 0.328989 | -1.60389 | 0.001041 | Calpain 6 [Source:HGNC Symbol;Acc:HGNC:1483]                                                                                           |
| ENSOARG00000000581 | LRRRC31  | 43.29512 | 65.09673 | 21.49351 | 0.330178 | -1.59868 | 0.008169 | Advanced glycosylation end product-specific receptor [Source:HGNC Symbol;Acc:HGNC:320]                                                 |
| ENSOARG00000002466 | -        | 337.3099 | 506.7324 | 167.8875 | 0.331314 | -1.59373 | 0.045742 | -                                                                                                                                      |
| ENSOARG00000021000 | -        | 85.95493 | 128.5734 | 43.33645 | 0.337056 | -1.56894 | 0.019898 | Uncharacterized protein [Source:UniProtKB/TrEMBL;Acc:W5QIL5]                                                                           |
| ENSOARG00000013163 | ACSM3    | 38.58571 | 57.67949 | 19.49193 | 0.337935 | -1.56518 | 0.016685 | Acyl-CoA synthetase medium-chain family member 3 [Source:HGNC Symbol;Acc:HGNC:10522]                                                   |
| ENSOARG00000006333 | PCBD1    | 71.7466  | 107.0324 | 36.46078 | 0.340652 | -1.55363 | 0.014995 | Pterin-4 alpha-carbinolaminatedehydratase/dimerization cofactor of hepatocyte nuclearfactor 1 alpha [Source:HGNC Symbol;Acc:HGNC:8646] |
| ENSOARG00000009499 | BST1     | 42.28088 | 63.02837 | 21.53338 | 0.341646 | -1.54943 | 0.037646 | Bone marrow stromal cell antigen 1 [Source:HGNC Symbol;Acc:HGNC:1118]                                                                  |
| ENSOARG00000000317 | LOX      | 42.35598 | 63.10416 | 21.60781 | 0.342415 | -1.54618 | 0.046977 | A kinase (PRKA) anchor protein 5 [Source:HGNC Symbol;Acc:HGNC:375]                                                                     |
| ENSOARG00000019888 | PTPN22   | 72.07532 | 107.1727 | 36.97795 | 0.345031 | -1.5352  | 0.008623 | Protein tyrosine phosphatase, non-receptor type 22(lymphoid) [Source:HGNC Symbol;Acc:HGNC:9652]                                        |
| ENSOARG00000009653 | RGS2     | 533.4747 | 791.654  | 275.2954 | 0.347747 | -1.52389 | 1.46E-06 | Regulator of G-protein signaling 2 [Source:HGNC Symbol;Acc:HGNC:9998]                                                                  |
| ENSOARG00000008143 | SMPDL3A  | 62.71123 | 92.55886 | 32.8636  | 0.355056 | -1.49388 | 0.048429 | Sphingomyelin phosphodiesterase, acid-like 3A [Source:HGNC Symbol;Acc:HGNC:17389]                                                      |
| ENSOARG00000013664 | SKA3     | 34.28178 | 50.25835 | 18.30522 | 0.364222 | -1.45711 | 0.031174 | Spindle and kinetochore associated complex subunit3 [Source:HGNC Symbol;Acc:HGNC:20262]                                                |
| ENSOARG00000006374 | -        | 40.57881 | 59.31157 | 21.84605 | 0.368327 | -1.44094 | 0.037691 | -                                                                                                                                      |
| ENSOARG00000007202 | SPON1    | 143.31   | 209.4094 | 77.21048 | 0.368706 | -1.43946 | 0.03278  | Spondin 1, extracellular matrix protein [Source:HGNC Symbol;Acc:HGNC:11252]                                                            |
| ENSOARG00000008468 | EMB      | 46.9727  | 68.41517 | 25.53022 | 0.373166 | -1.42211 | 0.029456 | Embigin [Source:HGNC Symbol;Acc:HGNC:30465]                                                                                            |
| ENSOARG00000006370 | ASF1B    | 60.21145 | 87.36596 | 33.05695 | 0.378373 | -1.40212 | 0.04953  | Anti-silencing function 1B histone chaperone [Source:HGNC Symbol;Acc:HGNC:20996]                                                       |
| ENSOARG00000014749 | ALDH8A1  | 31.62599 | 45.87795 | 17.37403 | 0.378701 | -1.40087 | 0.040165 | Aldehyde dehydrogenase 8 family, member A1 [Source:HGNC Symbol;Acc:HGNC:15471]                                                         |
| ENSOARG00000006007 | NGFR     | 29.25298 | 42.3564  | 16.14956 | 0.381278 | -1.39109 | 0.046984 | Nerve growth factor receptor [Source:HGNC Symbol;Acc:HGNC:7809]                                                                        |
| ENSOARG00000010184 | AK4      | 66.23334 | 94.9576  | 37.50908 | 0.395009 | -1.34004 | 0.046676 | Adenylate kinase 4 [Source:HGNC Symbol;Acc:HGNC:363]                                                                                   |
| ENSOARG00000018772 | ACAD10   | 2693.832 | 3843.829 | 1543.834 | 0.40164  | -1.31603 | 2.96E-06 | Uncharacterized protein [Source:UniProtKB/TrEMBL;Acc:W5QBS0]                                                                           |
| ENSOARG00000000991 | AKAP5    | 128.8338 | 183.7849 | 73.88278 | 0.402007 | -1.31471 | 0.000907 | Lysyl oxidase [Source:HGNC Symbol;Acc:HGNC:6664]                                                                                       |
| ENSOARG00000001534 | PIEZO2   | 180.3137 | 256.659  | 103.9684 | 0.405084 | -1.30371 | 0.001669 | Piezo-type mechanosensitive ion channel component 2 [Source:HGNC Symbol;Acc:HGNC:26270]                                                |
| ENSOARG00000011453 | SELENOW  | 982.3727 | 1382.871 | 581.8741 | 0.420772 | -1.24889 | 1.78E-05 | Selenoprotein W, 1 [Source:HGNC Symbol;Acc:HGNC:10752]                                                                                 |
| ENSOARG00000020413 | SERPINE2 | 252.0039 | 354.3999 | 149.608  | 0.422144 | -1.24419 | 0.034656 | Serpin peptidase inhibitor, clade E (nexin, plasminogen activator inhibitor type 1), member 2 [Source:HGNC Symbol;Acc:HGNC:8951]       |



|                     |         |          |          |          |          |          |          |                                                                                                                              |
|---------------------|---------|----------|----------|----------|----------|----------|----------|------------------------------------------------------------------------------------------------------------------------------|
| ENSOARG00000006895  | PODXL2  | 58.03811 | 81.61601 | 34.4602  | 0.422224 | -1.24392 | 0.040804 | Podocalyxin-like 2 [Source:HGNC Symbol;Acc:HGNC:17936]                                                                       |
| ENSOARG00000015414  | -       | 70.05157 | 98.34179 | 41.76134 | 0.424655 | -1.23564 | 0.043128 | Uncharacterized protein [Source:UniProtKB/TrEMBL;Acc:W5Q1E8]                                                                 |
| ENSOARG00000009911  | PROM1   | 74.83146 | 104.8975 | 44.76542 | 0.426754 | -1.22852 | 0.012325 | Prominin 1 [Source:HGNC Symbol;Acc:HGNC:9454]                                                                                |
| ENSOARG00000004886  | UBXN11  | 68.44502 | 95.66243 | 41.2276  | 0.43097  | -1.21434 | 0.04365  | UBX domain protein 11 [Source:HGNC Symbol;Acc:HGNC:30600]                                                                    |
| ENSOARG00000020279  | AHSA2   | 124.7293 | 174.0873 | 75.37141 | 0.432952 | -1.20772 | 0.01114  | AHA1, activator of heat shock 90kDa protein ATPase homolog 2 (yeast) [Source:HGNC Symbol;Acc:HGNC:20437]                     |
| ENSOARG00000011513  | IRF8    | 155.9224 | 217.3393 | 94.50547 | 0.434829 | -1.20148 | 0.038289 | Interferon regulatory factor 8 [Source:HGNC Symbol;Acc:HGNC:5358]                                                            |
| ENSOARG00000006809  | -       | 67.60541 | 94.2091  | 41.00171 | 0.43522  | -1.20018 | 0.024833 | Uncharacterized protein [Source:UniProtKB/TrEMBL;Acc:W5PA32]                                                                 |
| ENSOARG00000002973  | KCNN3   | 67.73298 | 94.32877 | 41.1372  | 0.436105 | -1.19725 | 0.02145  | Potassium intermediate/small conductance calcium-activated channel, subfamily N, member 3 [Source:HGNC Symbol;Acc:HGNC:6292] |
| ENSOARG00000011945  | ELN     | 319.0865 | 442.2779 | 195.8951 | 0.442923 | -1.17487 | 0.010825 | Elastin [Source:HGNC Symbol;Acc:HGNC:3327]                                                                                   |
| ENSOARG00000011841  | ANPEP   | 1945.271 | 2691.119 | 1199.424 | 0.445697 | -1.16586 | 0.004394 | Alanine (membrane) aminopeptidase [Source:HGNC Symbol;Acc:HGNC:500]                                                          |
| ENSOARG00000017314  | GALNT6  | 59.55921 | 82.34306 | 36.77536 | 0.446612 | -1.16291 | 0.044191 | Polypeptide N-acetylgalactosaminyltransferase 6 [Source:HGNC Symbol;Acc:HGNC:4128]                                           |
| ENSOARG00000017084  | -       | 331.4105 | 457.2848 | 205.5362 | 0.449471 | -1.1537  | 0.000658 | Uncharacterized protein [Source:UniProtKB/TrEMBL;Acc:W5Q6J5]                                                                 |
| ENSOARG000000021170 | ARG2    | 469.6509 | 647.6833 | 291.6184 | 0.450248 | -1.15121 | 0.000824 | Uncharacterized protein [Source:UniProtKB/TrEMBL;Acc:W5QJ54]                                                                 |
| ENSOARG00000004796  | CD22    | 205.2136 | 282.9537 | 127.4735 | 0.45051  | -1.15037 | 0.032273 | CD22 molecule [Source:HGNC Symbol;Acc:HGNC:1643]                                                                             |
| ENSOARG00000016110  | BRIP1   | 71.06383 | 97.9214  | 44.20627 | 0.451446 | -1.14737 | 0.017653 | BRCA1 interacting protein C-terminal helicase 1 [Source:HGNC Symbol;Acc:HGNC:20473]                                          |
| ENSOARG00000002340  | ZGRF1   | 39.52139 | 54.41874 | 24.62404 | 0.452492 | -1.14404 | 0.048402 | Zinc finger, GRF-type containing 1 [Source:HGNC Symbol;Acc:HGNC:25654]                                                       |
| ENSOARG00000015400  | WNT5A   | 249.4285 | 343.3657 | 155.4914 | 0.452845 | -1.14291 | 0.000791 | Wingless-type MMTV integration site family, member 5A [Source:HGNC Symbol;Acc:HGNC:12784]                                    |
| ENSOARG00000014093  | LRRN1   | 87.97216 | 121.0479 | 54.89638 | 0.453509 | -1.1408  | 0.013215 | Leucine rich repeat neuronal 1 [Source:HGNC Symbol;Acc:HGNC:20980]                                                           |
| ENSOARG00000020170  | FAM161A | 77.045   | 105.9777 | 48.1123  | 0.453985 | -1.13928 | 0.014715 | Family with sequence similarity 161, member A [Source:HGNC Symbol;Acc:HGNC:25808]                                            |
| ENSOARG00000008262  | SCN2B   | 65.00697 | 89.38859 | 40.62535 | 0.45448  | -1.13771 | 0.01912  | Sodium channel, voltage-gated, type II, beta subunit [Source:HGNC Symbol;Acc:HGNC:10589]                                     |
| ENSOARG00000008351  | SLCO2A1 | 185.0614 | 252.8079 | 117.3148 | 0.464047 | -1.10766 | 0.001591 | Solute carrier organic anion transporter family, member 2A1 [Source:HGNC Symbol;Acc:HGNC:10955]                              |
| ENSOARG00000001884  | RIMKLB  | 71.57948 | 97.66675 | 45.49221 | 0.46579  | -1.10225 | 0.025082 | Ribosomal modification protein rimK-like family member B [Source:HGNC Symbol;Acc:HGNC:29228]                                 |
| ENSOARG00000020996  | ATP8B4  | 381.9666 | 520.9764 | 242.9568 | 0.466349 | -1.10052 | 0.034074 | ATPase, class I, type 8B, member 4 [Source:HGNC Symbol;Acc:HGNC:13536]                                                       |
| ENSOARG00000018978  | RNASEL  | 90.24986 | 122.9794 | 57.52029 | 0.467723 | -1.09627 | 0.017866 | Ribonuclease L (2',5'-oligoadenylate synthetase-dependent) [Source:HGNC Symbol;Acc:HGNC:10050]                               |
| ENSOARG00000020768  | -       | 327.0656 | 443.6843 | 210.4469 | 0.474317 | -1.07608 | 0.036012 | Uncharacterized protein [Source:UniProtKB/TrEMBL;Acc:W5QHX2]                                                                 |
| ENSOARG00000017961  | PTPLAD1 | 121.3198 | 164.1246 | 78.51501 | 0.478387 | -1.06375 | 0.013467 | Protein tyrosine phosphatase-like A domain containing 1 [Source:HGNC                                                         |

| Symbol;Acc:HGNC:24175] |         |          |          |          |          |          |          |                                                                                          |
|------------------------|---------|----------|----------|----------|----------|----------|----------|------------------------------------------------------------------------------------------|
| ENSOARG00000018575     | ZKSCAN2 | 66.63701 | 90.10219 | 43.17183 | 0.479143 | -1.06147 | 0.028274 | Zinc finger with KRAB and SCAN domains 2 [Source:HGNC Symbol;Acc:HGNC:25677]             |
| ENSOARG00000008878     | CD84    | 215.2776 | 290.9685 | 139.5868 | 0.479732 | -1.0597  | 0.049752 | CD84 molecule [Source:HGNC Symbol;Acc:HGNC:1704]"                                        |
| ENSOARG00000006056     | LPAR4   | 80.03908 | 107.9253 | 52.15284 | 0.483231 | -1.04922 | 0.03311  | Lysophosphatidic acid receptor 4 [Source:HGNC Symbol;Acc:HGNC:4478]                      |
| ENSOARG00000015273     | BORA    | 99.32588 | 133.8093 | 64.84241 | 0.484588 | -1.04517 | 0.011391 | Bora, aurora kinase A activator [Source:HGNC Symbol;Acc:HGNC:24724]                      |
| ENSOARG00000012752     | -       | 55.40205 | 74.60768 | 36.19642 | 0.485157 | -1.04348 | 0.044335 | Uncharacterized protein [Source:UniProtKB/TrEMBL;Acc:W5PT72]                             |
| ENSOARG00000019689     | MANSC4  | 192.0284 | 258.4676 | 125.5892 | 0.485899 | -1.04127 | 0.015716 | MANSC domain containing 4 [Source:HGNC Symbol;Acc:HGNC:40023]                            |
| ENSOARG00000012355     | WEE1    | 184.4189 | 247.869  | 120.9688 | 0.488035 | -1.03494 | 0.005429 | WEE1 G2 checkpoint kinase [Source:HGNC Symbol;Acc:HGNC:12761]                            |
| ENSOARG00000005180     | HLTF    | 613.6813 | 823.326  | 404.0366 | 0.490737 | -1.02698 | 0.005168 | Helicase-like transcription factor [Source:HGNC Symbol;Acc:HGNC:11099]                   |
| ENSOARG00000010529     | KAZN    | 87.91252 | 117.6481 | 58.17697 | 0.4945   | -1.01596 | 0.024627 | Kazrin, periplakin interacting protein [Source:HGNC Symbol;Acc:HGNC:29173]               |
| ENSOARG00000013977     | SSX2IP  | 65.89572 | 88.07162 | 43.71983 | 0.496412 | -1.01039 | 0.045396 | Synovial sarcoma, X breakpoint 2 interacting protein [Source:HGNC Symbol;Acc:HGNC:16509] |
| ENSOARG00000016590     | TRIM29  | 455.6445 | 607.9072 | 303.3819 | 0.49906  | -1.00272 | 0.014652 | Tripartite motif containing 29 [Source:HGNC Symbol;Acc:HGNC:17274]                       |
| ENSOARG00000018430     | -       | 92.9954  | 124.0385 | 61.95233 | 0.499461 | -1.00156 | 0.023468 | -                                                                                        |
